# Supplementary material
Source: publisher figshare collection journal article supplement (https://f1000.figshare.com/ndownloader/files/1363097)
Supplement: Supplementary file 1 [file 1363097]

Block	Genotype	Site	Year	SizeIndex	Richness	TotalMeanAbundance	EpinotiaTetraquetrana	PhyllonorycterCavella	Phyllonorycter1	ParornixBetulae	ParornixSP	EriocraniaSp	DeporausBetulae	Heteropteran1	FenusaPumila	Stigmella	ArgomyzaAlnibetulae	Lepidoptera4	OrchestesRusci	PhylloporiaBistrigella	HemicroaAustralis	Teleoides	Euzephora	Phyllonorycter2	Lepidoptera2	Cecidomyiidae	Trichiosoma	CroesusSeptentrionalis	Microlepidoptera1	RheumapteraHastata	Lepidoptera1	Lepidoptera3	EuceraphisBetulae
1	2	1	2003	120	8	0.666666667	1	1	0	0	0	3	0	0	0	0	0	0	0	0	4	3	1	0	0	0	1	0	4	0	0	0	0
1	3	1	2003	120	7	0.62962963	1	0	0	0	0	1	0	1	0	0	0	1	0	0	0	7	0	0	1	0	0	0	5	0	0	0	0
1	4	1	2003	120	7	0.592592593	0	0	0	0	1	6	0	3	0	1	1	1	0	0	0	3	0	0	0	0	0	0	0	0	0	0	0
1	5	1	2003	60	4	0.222222222	1	0	0	0	0	1	0	0	0	0	3	0	0	0	0	0	0	0	0	0	0	0	1	0	0	0	0
1	6	1	2003	60	8	0.555555556	2	1	0	0	0	3	0	4	0	0	1	0	1	0	0	2	0	0	0	0	0	0	0	0	0	0	1
1	7	1	2003	60	6	1.333333333	1	0	0	0	0	30	1	0	0	0	0	0	0	0	0	0	1	0	0	0	0	0	2	0	0	1	0
1	8	1	2003	120	10	0.777777778	1	1	0	0	0	0	2	6	1	0	0	1	0	2	1	5	0	0	0	0	0	0	1	0	0	0	0
1	9	1	2003	120	8	0.592592593	2	1	1	0	0	2	0	4	0	0	1	0	0	0	0	2	0	0	0	0	0	0	3	0	0	0	0
1	12	1	2003	120	9	0.814814815	0	0	0	0	0	7	0	3	1	0	0	1	0	0	1	3	3	0	0	0	0	0	2	0	0	1	0
1	14	1	2003	120	9	0.481481481	1	1	0	1	1	2	0	2	0	0	0	0	0	0	0	1	3	0	0	0	0	0	1	0	0	0	0
1	15	1	2003	60	5	0.222222222	1	0	0	1	0	2	0	1	0	0	0	0	0	1	0	0	0	0	0	0	0	0	0	0	0	0	0
1	16	1	2003	120	8	0.888888889	2	0	0	0	0	6	0	7	0	0	0	2	0	0	0	1	1	0	0	0	0	0	4	0	0	1	0
1	17	1	2003	120	6	0.62962963	0	0	0	0	0	5	0	5	0	0	3	0	1	0	0	1	0	0	0	0	0	0	2	0	0	0	0
1	18	1	2003	120	5	0.666666667	3	0	0	0	0	0	0	3	1	0	0	0	0	0	0	7	0	0	0	0	0	0	4	0	0	0	0
1	19	1	2003	60	5	0.407407407	0	0	0	0	0	5	0	2	0	0	0	0	0	0	0	2	1	0	0	0	0	0	1	0	0	0	0
1	20	1	2003	120	7	0.62962963	3	0	0	0	1	7	0	0	1	0	2	0	0	0	0	1	0	0	0	0	0	0	2	0	0	0	0
1	22	1	2003	120	9	0.703703704	1	0	0	0	0	8	1	1	0	0	1	0	0	0	1	4	0	0	0	0	1	0	1	0	0	0	0
1	23	1	2003	60	6	0.444444444	0	0	1	1	0	0	0	7	0	0	1	0	1	0	0	0	1	0	0	0	0	0	0	0	0	0	0
1	24	1	2003	120	4	0.37037037	0	0	0	0	0	5	0	2	0	1	0	2	0	0	0	0	0	0	0	0	0	0	0	0	0	0	0
1	25	1	2003	120	9	1.148148148	1	0	0	0	0	6	1	4	1	0	0	0	0	0	2	1	1	0	0	0	0	14	0	0	0	0	0
1	26	1	2003	60	5	0.333333333	1	0	0	0	0	3	0	0	0	0	0	1	0	0	1	3	0	0	0	0	0	0	0	0	0	0	0
1	30	1	2003	120	7	0.62962963	0	0	0	0	1	10	0	2	1	0	1	0	1	0	0	0	0	0	0	0	0	0	1	0	0	0	0
2	2	1	2003	60	5	0.444444444	0	0	0	0	0	7	0	2	1	0	0	0	0	1	0	1	0	0	0	0	0	0	0	0	0	0	0
2	3	1	2003	120	10	0.444444444	1	0	0	0	0	0	1	2	1	0	0	1	1	0	0	1	1	0	1	0	0	0	2	0	0	0	0
2	4	1	2003	120	10	0.62962963	1	2	0	0	0	4	0	0	1	0	0	1	0	0	1	3	1	1	0	0	0	0	2	0	0	0	0
2	5	1	2003	60	10	0.925925926	0	2	0	0	0	8	1	4	1	1	1	0	0	0	0	2	0	0	0	0	0	0	2	0	0	0	3
2	6	1	2003	120	11	1.333333333	3	0	1	2	1	11	0	5	0	0	0	4	0	0	1	2	3	0	0	0	0	0	3	0	0	0	0
2	7	1	2003	120	9	1.148148148	0	0	0	0	0	13	1	3	1	0	0	1	2	0	0	6	3	0	0	0	0	0	1	0	0	0	0
2	8	1	2003	120	7	0.777777778	1	0	1	1	0	7	0	2	0	0	0	4	0	0	0	5	0	0	0	0	0	0	0	0	0	0	0
2	9	1	2003	120	10	0.925925926	4	1	0	0	0	5	1	6	1	0	0	2	0	0	0	3	1	0	0	0	0	0	1	0	0	0	0
2	12	1	2003	60	8	0.592592593	0	1	0	0	0	2	0	1	0	0	0	3	0	0	4	2	2	0	0	0	0	0	1	0	0	0	0
2	14	1	2003	120	5	0.37037037	0	0	0	0	0	0	1	2	0	0	1	2	0	0	0	0	0	0	0	0	0	0	4	0	0	0	0
2	15	1	2003	120	11	1.111111111	1	0	0	0	0	10	2	0	2	0	2	3	0	1	2	1	2	0	0	0	0	0	4	0	0	0	0
2	16	1	2003	60	8	0.888888889	0	1	0	1	0	3	5	9	0	0	0	3	0	0	0	1	1	0	0	0	0	0	0	0	0	0	0
2	17	1	2003	120	6	0.888888889	0	0	0	0	0	11	0	4	2	0	1	0	0	0	0	4	0	0	0	0	0	0	2	0	0	0	0
2	18	1	2003	120	5	0.37037037	0	0	0	1	0	2	0	3	0	0	0	1	0	0	0	3	0	0	0	0	0	0	0	0	0	0	0
2	19	1	2003	120	11	0.851851852	2	1	0	0	1	4	1	1	0	0	0	3	1	0	0	4	1	0	0	0	0	0	4	0	0	0	0
2	20	1	2003	120	8	0.962962963	1	2	0	0	0	6	8	0	3	0	0	1	0	0	2	3	0	0	0	0	0	0	0	0	0	0	0
2	22	1	2003	60	9	0.62962963	0	0	0	0	0	4	3	3	0	0	1	1	0	2	0	1	1	0	0	0	0	0	1	0	0	0	0
2	23	1	2003	120	8	0.962962963	2	0	0	2	0	1	0	0	0	0	0	4	0	0	0	9	1	0	0	0	0	0	4	0	0	0	3
2	24	1	2003	120	12	0.703703704	1	0	1	1	0	3	1	3	1	0	1	0	0	1	1	3	0	0	0	0	0	0	2	0	0	0	0
2	25	1	2003	120	10	1.37037037	0	0	0	2	0	17	0	6	0	0	0	2	1	0	1	1	5	0	0	0	0	0	1	0	0	1	0
2	26	1	2003	30	6	0.222222222	1	0	0	0	0	0	0	1	1	0	0	1	0	1	0	0	0	0	0	0	0	0	1	0	0	0	0
2	30	1	2003	120	8	0.666666667	0	1	0	0	0	6	0	0	0	0	0	3	0	0	0	2	2	0	1	0	0	0	2	0	0	1	0
3	2	1	2003	120	9	0.555555556	0	1	0	0	1	2	0	2	0	0	0	3	1	0	0	2	2	0	0	0	0	0	1	0	0	0	0
3	3	1	2003	120	8	0.555555556	0	1	0	0	0	3	1	1	1	0	0	3	0	0	0	2	3	0	0	0	0	0	0	0	0	0	0
3	4	1	2003	120	10	1.222222222	3	0	0	0	0	15	0	4	0	0	0	2	0	0	1	3	2	0	1	0	0	0	1	1	0	0	0
3	5	1	2003	60	7	0.37037037	1	0	1	0	0	3	0	2	1	0	0	0	0	0	0	0	0	0	1	0	0	0	1	0	0	0	0
3	6	1	2003	60	9	0.888888889	1	1	0	0	0	6	6	5	0	0	0	0	2	0	1	1	0	0	0	0	0	0	1	0	0	0	0
3	7	1	2003	60	4	0.296296296	0	0	0	0	0	5	0	1	0	0	0	1	0	0	0	0	1	0	0	0	0	0	0	0	0	0	0
3	8	1	2003	120	10	2.333333333	3	0	0	0	0	13	10	3	0	0	0	4	0	1	0	4	8	0	0	0	0	11	6	0	0	0	0
3	9	1	2003	120	10	0.814814815	4	2	0	0	1	7	1	1	0	0	0	1	1	0	0	2	0	0	0	0	0	0	2	0	0	0	0
3	12	1	2003	30	4	0.222222222	1	2	0	0	0	2	1	0	0	0	0	0	0	0	0	0	0	0	0	0	0	0	0	0	0	0	0
3	14	1	2003	120	11	0.888888889	1	0	2	1	0	2	0	5	5	0	1	0	1	0	0	2	0	0	0	0	0	0	3	0	0	0	1
3	15	1	2003	120	10	0.925925926	5	1	0	0	0	4	0	0	1	0	1	3	0	0	0	2	6	0	1	0	0	0	0	0	0	1	0
3	16	1	2003	120	10	0.777777778	1	1	0	0	0	1	0	2	0	0	0	5	1	1	0	1	4	0	0	0	0	0	4	0	0	0	0
3	18	1	2003	60	6	0.592592593	1	0	0	1	0	10	0	2	0	0	0	0	0	0	0	0	1	0	0	0	0	0	0	0	1	0	0
3	19	1	2003	30	4	0.296296296	0	0	0	0	0	5	0	1	0	0	0	0	0	0	0	1	1	0	0	0	0	0	0	0	0	0	0
3	20	1	2003	60	7	0.592592593	1	1	0	0	1	4	0	4	0	0	0	0	0	0	0	0	3	0	0	0	0	0	2	0	0	0	0
3	22	1	2003	60	4	0.222222222	0	0	0	0	0	2	0	0	0	0	0	0	0	0	0	2	0	0	0	0	0	0	1	0	0	0	1
3	23	1	2003	60	8	0.555555556	1	0	0	0	0	2	3	3	0	0	0	1	0	0	0	1	0	0	1	0	0	0	3	0	0	0	0
3	24	1	2003	60	6	0.555555556	1	0	0	0	0	7	0	2	0	0	0	2	0	0	0	2	0	0	0	0	0	0	1	0	0	0	0
3	25	1	2003	120	6	1.111111111	0	0	0	0	0	20	1	3	0	0	0	4	0	0	0	1	1	0	0	0	0	0	0	0	0	0	0
3	26	1	2003	30	6	0.37037037	1	1	0	1	0	4	0	1	0	0	0	0	0	0	2	0	0	0	0	0	0	0	0	0	0	0	0
3	30	1	2003	120	8	1	1	2	0	0	0	13	0	2	1	0	0	3	0	0	0	3	0	0	0	0	0	0	2	0	0	0	0
4	2	1	2003	120	11	1.407407407	3	1	0	7	0	11	5	1	3	0	0	1	0	3	0	2	0	0	0	0	0	0	1	0	0	0	0
4	3	1	2003	120	8	0.481481481	0	1	0	0	0	1	0	2	1	0	0	3	0	0	0	1	2	0	0	0	0	0	2	0	0	0	0
4	4	1	2003	120	10	0.777777778	0	0	0	1	1	5	0	3	1	0	0	3	0	0	1	0	3	0	0	0	0	0	2	0	0	1	0
4	5	1	2003	60	3	0.296296296	0	0	0	0	0	0	0	6	1	0	0	0	0	0	0	0	0	0	0	0	0	0	1	0	0	0	0
4	6	1	2003	60	6	0.333333333	2	0	0	0	0	1	0	2	0	0	0	1	0	0	0	1	0	0	0	0	0	0	2	0	0	0	0
4	7	1	2003	120	9	0.62962963	0	1	1	0	0	5	0	1	0	1	0	0	0	0	0	3	1	0	0	0	0	0	3	0	1	0	0
4	8	1	2003	120	12	0.740740741	2	0	0	1	2	2	2	2	1	0	1	1	0	0	3	1	0	0	0	0	0	0	2	0	0	0	0
4	9	1	2003	120	7	0.666666667	0	1	0	0	0	9	0	3	0	1	0	0	1	0	1	0	0	0	0	0	0	0	2	0	0	0	0
4	12	1	2003	60	9	0.740740741	0	1	1	1	0	9	0	1	0	0	0	0	0	1	0	0	4	0	0	0	0	0	1	0	0	1	0
4	14	1	2003	120	9	0.777777778	0	0	1	0	0	5	0	1	2	0	0	4	0	0	0	5	1	0	0	0	0	0	1	1	0	0	0
4	15	1	2003	120	7	0.740740741	0	0	0	0	0	10	0	0	1	0	0	2	0	1	0	1	1	0	0	0	0	0	4	0	0	0	0
4	16	1	2003	120	5	0.666666667	0	0	0	0	0	2	0	5	0	0	0	0	0	0	0	6	3	0	0	0	0	0	0	0	0	2	0
4	17	1	2003	120	6	0.518518519	0	0	0	2	1	7	0	1	1	0	0	0	0	0	0	0	0	0	0	0	0	0	2	0	0	0	0
4	18	1	2003	120	7	0.555555556	0	0	0	0	0	3	0	1	1	0	0	3	0	0	0	1	2	0	0	0	0	0	4	0	0	0	0
4	19	1	2003	60	4	0.333333333	1	0	0	0	0	5	0	2	0	0	0	0	0	0	0	1	0	0	0	0	0	0	0	0	0	0	0
4	20	1	2003	60	6	0.37037037	0	0	0	0	0	3	0	0	0	0	0	1	0	0	1	2	2	0	0	0	0	0	1	0	0	0	0
4	22	1	2003	120	9	0.592592593	0	0	0	1	0	3	1	0	0	0	1	4	1	2	2	0	1	0	0	0	0	0	0	0	0	0	0
4	23	1	2003	30	5	0.296296296	2	1	0	0	0	2	0	2	1	0	0	0	0	0	0	0	0	0	0	0	0	0	0	0	0	0	0
4	24	1	2003	60	2	0.777777778	0	0	0	0	0	20	0	1	0	0	0	0	0	0	0	0	0	0	0	0	0	0	0	0	0	0	0
4	25	1	2003	60	6	0.592592593	1	0	0	0	1	8	0	3	0	0	0	0	0	0	0	2	0	0	0	0	0	0	1	0	0	0	0
4	26	1	2003	30	4	0.333333333	0	0	0	0	0	6	0	1	0	1	0	0	0	0	1	0	0	0	0	0	0	0	0	0	0	0	0
4	30	1	2003	120	7	0.555555556	0	0	0	1	1	4	0	4	2	0	0	1	0	0	0	0	2	0	0	0	0	0	0	0	0	0	0
5	2	1	2003	120	10	1.037037037	0	2	0	4	2	2	0	0	2	0	0	0	0	1	0	3	1	0	0	0	0	9	2	0	0	0	0
5	3	1	2003	60	8	0.777777778	6	1	0	0	0	6	1	2	0	0	0	0	0	0	0	1	3	0	0	0	0	0	1	0	0	0	0
5	4	1	2003	120	11	0.814814815	2	2	0	0	0	5	0	2	1	0	1	3	0	2	0	2	1	0	0	0	0	0	1	0	0	0	0
5	5	1	2003	30	4	0.148148148	0	0	0	0	0	0	0	1	1	0	0	0	0	0	0	0	0	0	0	0	0	0	1	0	0	0	1
5	6	1	2003	60	12	1.111111111	2	2	0	1	0	2	10	4	1	0	0	3	0	0	0	1	1	0	0	0	0	0	2	0	0	1	0
5	7	1	2003	60	8	1.074074074	3	0	0	0	0	5	6	7	1	0	0	0	0	0	1	4	0	0	0	0	0	0	2	0	0	0	0
5	8	1	2003	60	5	0.407407407	2	0	0	1	0	0	0	0	0	0	0	4	0	0	0	2	0	0	0	0	0	0	2	0	0	0	0
5	9	1	2003	120	11	1.111111111	2	0	0	0	0	4	2	3	1	0	1	4	0	0	2	3	2	0	0	0	0	0	6	0	0	0	0
5	12	1	2003	30	3	0.148148148	0	0	0	0	0	2	0	0	0	0	0	0	0	0	0	0	0	0	0	1	0	0	1	0	0	0	0
5	14	1	2003	120	7	0.333333333	1	0	0	0	0	1	0	0	1	0	0	0	0	0	2	1	0	0	0	0	0	0	2	1	0	0	0
5	15	1	2003	60	6	0.333333333	1	0	0	0	0	3	0	0	0	0	0	0	0	0	0	1	1	0	0	0	0	0	2	0	1	0	0
5	16	1	2003	60	7	0.62962963	3	0	0	0	0	2	0	5	0	0	1	0	0	0	0	2	1	0	0	0	0	0	3	0	0	0	0
5	17	1	2003	60	6	0.481481481	1	0	0	1	0	4	0	2	0	0	0	0	0	0	0	3	0	0	0	0	0	0	2	0	0	0	0
5	18	1	2003	60	9	0.62962963	2	2	0	0	0	4	2	0	1	0	0	0	0	0	1	3	0	0	0	0	0	0	1	0	0	0	1
5	19	1	2003	30	5	0.37037037	2	1	0	0	0	5	0	1	0	0	0	0	0	0	0	1	0	0	0	0	0	0	0	0	0	0	0
5	20	1	2003	60	8	0.592592593	3	0	0	0	0	3	4	1	1	0	0	1	0	0	0	0	2	0	0	0	0	0	0	0	0	1	0
5	22	1	2003	120	8	0.666666667	0	0	0	0	0	3	1	4	3	0	0	2	0	0	0	0	2	1	0	0	0	0	2	0	0	0	0
5	23	1	2003	60	6	0.666666667	0	0	0	0	0	1	0	0	0	0	0	0	1	0	0	1	1	0	0	0	0	0	1	0	0	0	13
5	24	1	2003	30	5	0.37037037	5	0	0	0	0	2	0	1	0	0	0	1	0	0	0	1	0	0	0	0	0	0	0	0	0	0	0
5	25	1	2003	60	6	0.37037037	1	0	0	0	0	1	4	2	1	0	0	0	0	0	0	0	0	0	0	0	0	0	1	0	0	0	0
5	26	1	2003	30	8	1.037037037	3	0	0	0	0	10	5	2	0	0	0	1	0	0	1	0	0	0	0	0	0	0	1	0	0	0	5
5	30	1	2003	60	8	0.740740741	2	1	0	0	0	9	3	1	0	0	0	0	0	1	1	0	0	0	0	0	0	0	2	0	0	0	0
6	2	1	2003	60	6	0.444444444	1	0	0	0	0	6	0	2	0	0	1	0	0	0	0	0	1	0	0	0	0	0	1	0	0	0	0
6	3	1	2003	60	7	1.148148148	2	1	0	0	0	13	10	0	0	0	0	0	0	0	0	1	3	0	0	0	0	0	1	0	0	0	0
6	4	1	2003	30	7	0.296296296	0	1	0	0	0	1	0	1	0	0	0	1	1	0	0	1	0	0	0	0	0	0	2	0	0	0	0
6	5	1	2003	30	6	0.481481481	3	0	0	1	0	3	4	1	0	0	0	0	0	0	0	1	0	0	0	0	0	0	0	0	0	0	0
6	6	1	2003	60	7	2.148148148	4	0	0	0	0	16	24	0	0	0	0	2	0	0	1	0	0	0	0	0	0	0	5	0	0	0	6
6	7	1	2003	60	6	0.777777778	0	0	0	0	0	16	0	1	0	0	0	0	1	1	0	1	0	0	0	0	0	0	1	0	0	0	0
6	8	1	2003	120	10	1.407407407	2	1	0	0	0	18	3	4	0	0	1	5	0	1	0	0	1	0	0	0	0	0	2	0	0	0	0
6	9	1	2003	120	9	0.925925926	0	1	0	0	0	8	2	5	0	0	0	2	0	1	0	1	4	1	0	0	0	0	0	0	0	0	0
6	12	1	2003	60	8	1.074074074	0	0	0	0	0	17	1	3	1	0	0	3	1	0	0	1	0	0	0	0	0	0	2	0	0	0	0
6	14	1	2003	30	5	1.148148148	1	0	0	0	0	23	0	4	0	0	0	0	0	0	0	0	1	0	0	0	0	0	2	0	0	0	0
6	15	1	2003	60	6	0.518518519	5	0	0	0	0	3	0	1	2	0	0	1	0	0	0	0	0	0	0	0	0	0	0	0	0	0	2
6	16	1	2003	60	9	1.148148148	1	0	0	0	0	7	5	5	0	0	0	1	0	0	0	2	6	0	0	0	0	0	3	1	0	0	0
6	17	1	2003	120	8	1.074074074	0	0	0	0	0	16	1	2	0	0	1	3	0	2	0	2	2	0	0	0	0	0	0	0	0	0	0
6	18	1	2003	60	6	0.555555556	0	2	0	0	0	5	0	3	0	0	0	1	0	0	0	2	2	0	0	0	0	0	0	0	0	0	0
6	19	1	2003	60	12	0.814814815	7	1	0	1	0	1	1	2	0	1	0	0	0	1	1	4	1	0	0	0	0	0	1	0	0	0	0
6	20	1	2003	60	13	0.925925926	6	0	1	1	2	6	2	1	0	0	0	1	0	1	1	1	1	0	0	0	0	0	0	0	0	1	0
6	22	1	2003	60	7	0.555555556	1	0	0	0	0	4	0	2	0	0	0	1	0	0	0	1	3	0	0	0	0	0	3	0	0	0	0
6	23	1	2003	60	7	0.481481481	0	0	0	0	0	3	1	3	0	0	2	2	0	0	0	1	0	0	0	0	0	0	1	0	0	0	0
6	24	1	2003	60	5	0.37037037	0	0	0	0	1	5	0	0	0	0	0	0	1	0	2	0	1	0	0	0	0	0	0	0	0	0	0
6	25	1	2003	120	10	0.851851852	1	0	0	0	0	8	1	2	2	0	0	2	1	0	1	3	2	0	0	0	0	0	0	0	0	0	0
6	26	1	2003	30	10	0.925925926	7	0	0	0	0	3	3	1	0	0	0	0	0	1	3	1	2	0	0	0	0	0	1	0	0	0	3
6	30	1	2003	120	5	0.444444444	0	0	0	0	0	3	0	3	2	0	0	3	0	0	0	1	0	0	0	0	0	0	0	0	0	0	0
1	2	2	2003	30	5	0.851851852	1	0	0	0	0	15	5	1	0	0	0	0	0	0	0	0	1	0	0	0	0	0	0	0	0	0	0
1	3	2	2003	60	7	0.962962963	4	0	0	0	0	14	0	2	1	0	0	0	0	0	2	2	1	0	0	0	0	0	0	0	0	0	0
1	4	2	2003	30	3	1.037037037	2	0	0	0	0	20	0	6	0	0	0	0	0	0	0	0	0	0	0	0	0	0	0	0	0	0	0
1	5	2	2003	30	6	0.592592593	3	0	0	0	0	5	0	2	0	0	1	0	0	0	0	0	4	0	0	0	0	0	1	0	0	0	0
1	6	2	2003	60	3	0.925925926	0	0	0	0	0	16	0	7	0	0	0	0	0	0	0	0	0	0	0	0	0	0	0	0	0	0	2
1	7	2	2003	30	4	0.740740741	1	1	0	0	0	17	0	0	0	0	0	0	0	0	0	0	1	0	0	0	0	0	0	0	0	0	0
1	8	2	2003	30	4	0.777777778	0	0	0	0	0	11	8	1	0	0	0	0	0	0	1	0	0	0	0	0	0	0	0	0	0	0	0
1	9	2	2003	30	5	0.962962963	0	0	0	0	0	21	1	2	1	0	0	0	1	0	0	0	0	0	0	0	0	0	0	0	0	0	0
1	12	2	2003	60	8	1.592592593	1	1	0	0	0	31	0	4	2	0	0	0	0	1	0	0	2	0	0	0	0	0	1	0	0	0	0
1	14	2	2003	30	8	0.962962963	2	1	0	0	0	16	0	3	0	0	0	0	0	1	1	0	1	0	0	0	0	0	0	0	0	0	1
1	15	2	2003	30	5	0.814814815	1	1	0	0	0	17	0	0	0	0	0	0	0	0	0	0	0	0	0	0	0	0	1	0	0	0	2
1	16	2	2003	60	3	1.37037037	0	1	0	0	0	31	0	5	0	0	0	0	0	0	0	0	0	0	0	0	0	0	0	0	0	0	0
1	17	2	2003	30	6	1.518518519	1	0	0	0	0	33	0	4	1	0	0	0	0	1	1	0	0	0	0	0	0	0	0	0	0	0	0
1	18	2	2003	30	3	0.814814815	0	0	0	0	0	15	1	6	0	0	0	0	0	0	0	0	0	0	0	0	0	0	0	0	0	0	0
1	19	2	2003	30	4	0.814814815	1	0	0	0	0	18	0	0	1	0	0	0	0	0	0	0	0	0	0	0	0	0	2	0	0	0	0
1	20	2	2003	30	3	0.592592593	1	0	0	0	0	13	0	2	0	0	0	0	0	0	0	0	0	0	0	0	0	0	0	0	0	0	0
1	22	2	2003	30	7	1.296296296	1	0	0	0	0	26	1	4	1	0	0	0	0	0	0	1	0	0	0	0	0	0	0	0	0	0	1
1	23	2	2003	30	5	0.37037037	5	0	0	0	0	1	0	2	0	0	0	0	0	0	0	0	1	0	0	0	0	0	1	0	0	0	0
1	24	2	2003	30	3	1.777777778	0	0	0	1	0	42	0	5	0	0	0	0	0	0	0	0	0	0	0	0	0	0	0	0	0	0	0
1	25	2	2003	30	6	1.185185185	1	0	0	0	0	20	2	7	0	0	1	0	0	0	0	0	0	0	0	0	0	0	1	0	0	0	0
1	26	2	2003	30	6	0.888888889	2	2	0	0	0	4	6	8	0	0	0	2	0	0	0	0	0	0	0	0	0	0	0	0	0	0	0
1	30	2	2003	30	6	0.888888889	1	1	0	0	0	18	0	2	1	0	0	0	1	0	0	0	0	0	0	0	0	0	0	0	0	0	0
2	2	2	2003	30	4	0.333333333	0	0	0	0	0	6	0	1	0	0	0	1	0	0	1	0	0	0	0	0	0	0	0	0	0	0	0
2	3	2	2003	60	5	0.37037037	0	1	0	0	0	6	0	0	1	0	0	1	0	1	0	0	0	0	0	0	0	0	0	0	0	0	0
2	4	2	2003	30	4	1.037037037	0	0	0	0	0	23	0	2	0	0	0	1	0	0	0	0	2	0	0	0	0	0	0	0	0	0	0
2	5	2	2003	30	5	0.814814815	0	0	0	0	0	15	0	4	1	0	0	1	1	0	0	0	0	0	0	0	0	0	0	0	0	0	0
2	6	2	2003	60	8	1.333333333	0	1	0	1	0	26	0	3	0	0	0	0	0	0	0	0	1	0	0	1	0	0	1	0	0	0	2
2	7	2	2003	60	5	1.222222222	1	0	0	0	0	24	0	4	0	0	0	0	0	0	0	1	3	0	0	0	0	0	0	0	0	0	0
2	8	2	2003	60	10	1.851851852	0	0	0	0	0	30	2	3	1	0	0	1	0	0	2	0	3	0	0	2	0	0	1	0	0	0	5
2	9	2	2003	60	7	2.111111111	1	0	0	0	0	46	0	5	1	0	0	0	0	0	1	1	2	0	0	0	0	0	0	0	0	0	0
2	12	2	2003	30	5	1.518518519	0	0	0	0	0	32	0	3	0	0	0	0	0	0	1	0	4	0	0	0	0	0	1	0	0	0	0
2	14	2	2003	30	7	0.814814815	1	2	0	0	0	12	0	4	0	0	0	0	0	0	1	0	1	0	0	0	0	0	1	0	0	0	0
2	15	2	2003	60	5	1.037037037	0	0	0	0	0	22	0	0	0	0	0	3	0	0	0	0	1	0	0	1	0	0	1	0	0	0	0
2	16	2	2003	60	3	1.148148148	0	0	0	0	0	21	0	8	0	0	0	0	0	0	0	0	0	0	0	0	0	0	2	0	0	0	0
2	17	2	2003	30	6	1.62962963	0	0	0	0	0	31	0	9	1	0	0	1	0	0	0	1	0	0	0	0	0	0	1	0	0	0	0
2	18	2	2003	60	4	0.814814815	1	0	0	0	0	10	0	8	0	0	0	0	0	0	0	0	3	0	0	0	0	0	0	0	0	0	0
2	19	2	2003	30	4	1.074074074	3	1	0	0	0	24	0	1	0	0	0	0	0	0	0	0	0	0	0	0	0	0	0	0	0	0	0
2	20	2	2003	60	7	1.814814815	3	0	0	0	0	37	0	5	1	0	0	1	0	1	0	0	1	0	0	0	0	0	0	0	0	0	0
2	22	2	2003	60	4	1.259259259	0	0	0	0	0	20	0	11	0	0	1	0	0	0	0	0	2	0	0	0	0	0	0	0	0	0	0
2	23	2	2003	30	3	0.444444444	0	0	0	0	0	9	0	2	0	0	0	0	0	0	0	0	0	0	0	1	0	0	0	0	0	0	0
2	24	2	2003	30	3	0.814814815	1	0	0	0	0	16	0	5	0	0	0	0	0	0	0	0	0	0	0	0	0	0	0	0	0	0	0
2	25	2	2003	30	6	1.148148148	1	0	0	0	0	21	0	5	0	0	0	0	1	0	0	1	0	0	0	0	0	0	0	0	0	0	2
2	26	2	2003	60	5	0.62962963	0	1	1	0	0	10	0	4	0	0	0	0	0	0	0	1	0	0	0	0	0	0	0	0	0	0	0
2	30	2	2003	30	7	1.222222222	2	2	0	0	0	21	4	2	0	0	0	1	0	0	0	0	0	1	0	0	0	0	0	0	0	0	0
3	2	2	2003	60	4	0.740740741	1	0	0	0	0	14	0	4	0	0	0	0	0	0	0	1	0	0	0	0	0	0	0	0	0	0	0
3	3	2	2003	30	9	0.814814815	0	0	1	1	0	14	0	1	0	0	0	0	0	0	1	1	1	0	0	0	0	0	1	0	0	0	1
3	4	2	2003	30	6	1.37037037	1	0	0	0	0	23	0	6	0	0	0	2	0	0	0	0	3	0	0	0	0	0	2	0	0	0	0
3	5	2	2003	30	5	0.333333333	0	0	0	0	0	1	0	4	2	0	0	0	0	0	0	1	0	0	0	0	0	0	1	0	0	0	0
3	6	2	2003	60	6	1.222222222	4	0	0	1	0	0	10	8	0	0	0	0	0	0	0	0	0	0	0	0	0	0	2	0	0	0	8
3	7	2	2003	60	5	0.555555556	0	0	0	1	0	5	0	4	0	0	0	0	0	0	0	0	4	0	0	0	0	0	1	0	0	0	0
3	8	2	2003	60	8	1.185185185	0	0	0	0	0	18	4	3	1	0	0	1	0	1	0	3	0	0	0	0	0	0	1	0	0	0	0
3	9	2	2003	60	4	0.851851852	1	0	0	0	0	16	0	4	0	0	0	0	0	0	0	0	2	0	0	0	0	0	0	0	0	0	0
3	12	2	2003	60	7	0.888888889	2	0	0	0	0	10	0	5	0	0	0	1	0	0	0	1	4	0	0	0	0	0	1	0	0	0	0
3	14	2	2003	60	7	0.814814815	2	0	0	0	0	7	1	4	2	0	0	2	0	0	0	0	0	0	0	0	0	0	4	0	0	0	0
3	15	2	2003	60	10	2.222222222	2	0	0	0	0	32	7	1	2	0	0	1	0	0	0	0	4	1	0	0	0	0	0	0	0	1	9
3	16	2	2003	60	7	0.777777778	1	0	0	0	0	12	0	4	0	0	0	0	0	0	0	1	1	0	0	1	0	0	1	0	0	0	0
3	17	2	2003	30	8	2.851851852	1	0	0	0	0	55	4	6	0	0	0	0	0	0	0	0	1	0	0	1	0	0	2	0	0	0	7
3	18	2	2003	30	5	0.518518519	1	0	0	0	0	9	0	2	0	0	0	1	0	0	0	0	0	0	0	0	0	0	1	0	0	0	0
3	19	2	2003	30	5	0.222222222	1	1	0	0	0	2	0	1	0	0	0	0	0	0	0	0	0	0	0	0	0	0	1	0	0	0	0
3	20	2	2003	60	4	0.592592593	2	0	0	0	0	2	1	11	0	0	0	0	0	0	0	0	0	0	0	0	0	0	0	0	0	0	0
3	22	2	2003	30	4	0.444444444	1	0	0	0	0	4	0	5	0	0	0	0	0	0	0	0	0	0	0	0	0	0	2	0	0	0	0
3	23	2	2003	30	7	0.62962963	1	0	1	1	0	7	0	4	2	0	0	0	0	0	0	1	0	0	0	0	0	0	0	0	0	0	0
3	24	2	2003	60	6	0.851851852	1	0	0	0	0	14	0	5	0	0	0	0	0	0	0	0	1	1	0	0	0	0	1	0	0	0	0
3	25	2	2003	60	7	1.407407407	4	0	0	0	0	18	1	9	1	0	0	0	0	0	0	0	4	0	0	0	0	0	1	0	0	0	0
3	26	2	2003	30	4	0.333333333	0	0	0	0	0	2	0	5	1	0	0	0	0	0	0	0	0	0	0	1	0	0	0	0	0	0	0
3	30	2	2003	60	4	1.518518519	4	0	0	0	0	35	0	0	0	0	0	1	1	0	0	0	0	0	0	0	0	0	0	0	0	0	0
4	2	2	2003	60	5	0.37037037	0	1	0	0	0	1	0	4	1	0	0	0	0	0	0	0	3	0	0	0	0	0	0	0	0	0	0
4	3	2	2003	30	5	0.222222222	0	1	0	0	0	1	0	2	0	0	0	1	0	0	0	0	1	0	0	0	0	0	0	0	0	0	0
4	4	2	2003	30	7	0.851851852	1	0	0	0	0	12	3	1	4	0	0	0	0	0	0	0	1	0	0	0	0	0	1	0	0	0	0
4	5	2	2003	60	8	0.740740741	1	0	0	0	0	10	0	2	1	0	0	3	0	0	0	0	1	0	1	0	0	0	0	0	0	0	1
4	6	2	2003	30	6	0.962962963	1	0	0	0	0	15	3	2	0	0	0	0	0	0	0	0	0	0	0	1	0	0	0	0	0	0	4
4	7	2	2003	60	6	0.592592593	1	0	0	0	0	6	0	3	0	1	0	1	0	0	0	0	4	0	0	0	0	0	0	0	0	0	0
4	8	2	2003	60	8	0.703703704	2	0	0	0	0	1	3	8	0	0	0	0	0	0	0	1	1	0	0	1	0	0	2	0	0	0	0
4	9	2	2003	60	3	1.481481481	0	0	0	0	0	34	0	5	1	0	0	0	0	0	0	0	0	0	0	0	0	0	0	0	0	0	0
4	12	2	2003	60	8	1.962962963	1	0	0	0	0	40	3	3	0	0	0	0	2	0	0	2	1	0	0	0	0	0	1	0	0	0	0
4	14	2	2003	30	8	1.296296296	2	1	0	0	0	16	0	4	1	0	0	2	0	0	0	0	0	0	0	0	0	0	2	0	0	0	7
4	15	2	2003	60	6	1.37037037	2	1	0	0	0	28	2	1	3	0	0	0	0	0	0	0	0	0	0	0	0	0	0	0	0	0	0
4	16	2	2003	30	7	0.851851852	1	0	1	0	0	6	2	10	0	0	0	2	0	0	0	0	1	0	0	0	0	0	0	0	0	0	0
4	17	2	2003	30	6	1.259259259	1	1	0	0	0	22	0	8	0	0	0	0	0	0	0	1	0	0	0	0	0	0	1	0	0	0	0
4	18	2	2003	60	5	0.333333333	1	0	0	0	0	4	0	2	0	0	0	0	0	0	1	0	0	0	0	1	0	0	0	0	0	0	0
4	19	2	2003	30	4	0.888888889	2	0	0	0	0	20	0	1	0	0	0	0	0	0	0	0	0	0	0	0	0	0	1	0	0	0	0
4	20	2	2003	30	4	0.740740741	1	0	0	0	0	14	1	4	0	0	0	0	0	0	0	0	0	0	0	0	0	0	0	0	0	0	0
4	22	2	2003	60	8	1.666666667	0	0	0	1	0	31	1	5	1	0	0	1	0	0	0	0	1	0	0	0	0	0	0	0	0	0	4
4	23	2	2003	30	5	0.740740741	1	0	0	0	0	15	0	2	1	0	0	0	0	0	0	0	0	0	0	1	0	0	0	0	0	0	0
4	24	2	2003	60	3	2.259259259	0	0	0	0	0	42	0	16	0	0	0	0	0	0	0	0	3	0	0	0	0	0	0	0	0	0	0
4	25	2	2003	30	5	0.851851852	1	0	0	0	0	9	0	2	0	0	0	0	0	0	0	0	0	0	0	0	0	0	1	0	0	0	10
4	26	2	2003	60	7	1.444444444	0	1	0	0	0	25	2	4	0	0	0	2	0	0	0	0	2	0	0	3	0	0	0	0	0	0	0
4	30	2	2003	60	5	1.518518519	1	1	0	0	0	37	0	1	0	0	0	0	0	0	1	0	0	0	0	0	0	0	0	0	0	0	0
5	2	2	2003	30	5	1.407407407	0	0	0	0	0	28	0	1	1	0	0	5	0	0	0	0	3	0	0	0	0	0	0	0	0	0	0
5	3	2	2003	30	6	0.296296296	1	1	0	0	0	3	0	1	0	0	0	0	0	0	0	1	1	0	0	0	0	0	0	0	0	0	0
5	4	2	2003	30	6	1.074074074	2	0	0	0	0	13	3	6	2	0	0	3	0	0	0	0	0	0	0	0	0	0	0	0	0	0	0
5	5	2	2003	30	4	0.888888889	2	0	0	0	0	18	0	3	1	0	0	0	0	0	0	0	0	0	0	0	0	0	0	0	0	0	0
5	6	2	2003	30	6	1.259259259	2	0	0	0	0	15	6	6	0	0	0	0	0	0	0	0	3	0	0	0	0	0	0	0	0	0	2
5	7	2	2003	60	7	1.481481481	1	0	0	0	0	31	1	0	0	0	0	1	0	0	0	1	4	0	0	0	0	0	1	0	0	0	0
5	8	2	2003	60	6	0.777777778	0	0	0	0	0	14	1	2	0	0	0	1	0	0	1	0	2	0	0	0	0	0	0	0	0	0	0
5	9	2	2003	30	5	0.851851852	2	0	0	0	0	16	0	3	0	0	0	0	1	0	0	0	0	0	0	0	0	0	1	0	0	0	0
5	12	2	2003	60	8	1.62962963	0	0	0	0	0	33	2	3	1	0	0	0	0	1	1	1	2	0	0	0	0	0	0	0	0	0	0
5	14	2	2003	30	6	0.888888889	1	1	0	0	0	18	0	0	0	0	0	0	0	0	1	1	2	0	0	0	0	0	0	0	0	0	0
5	15	2	2003	30	6	0.555555556	1	0	0	0	0	4	0	1	1	0	0	1	0	0	0	0	0	0	0	0	0	0	0	0	0	0	7
5	16	2	2003	60	8	1.37037037	1	0	0	0	0	13	2	7	1	0	0	0	0	0	0	1	1	0	0	0	0	0	0	0	0	0	11
5	17	2	2003	60	7	1.555555556	1	0	0	0	0	32	0	1	1	0	0	2	0	0	0	2	3	0	0	0	0	0	0	0	0	0	0
5	18	2	2003	60	7	1.777777778	1	0	0	0	0	24	0	4	1	0	0	13	0	0	1	0	4	0	0	0	0	0	0	0	0	0	0
5	19	2	2003	30	4	0.740740741	3	0	0	0	0	15	1	0	0	0	0	0	1	0	0	0	0	0	0	0	0	0	0	0	0	0	0
5	20	2	2003	30	6	1.148148148	0	0	0	0	0	4	0	6	0	0	0	1	1	0	0	0	2	0	0	0	0	0	0	0	0	0	17
5	22	2	2003	30	5	1.111111111	0	0	0	0	0	24	0	3	0	0	0	1	0	0	0	1	0	0	0	0	0	0	1	0	0	0	0
5	23	2	2003	60	5	1.407407407	2	0	0	0	0	27	0	5	0	0	0	0	0	0	0	0	0	0	0	0	0	0	3	0	0	0	1
5	24	2	2003	30	4	1.111111111	3	0	0	1	0	22	0	4	0	0	0	0	0	0	0	0	0	0	0	0	0	0	0	0	0	0	0
5	25	2	2003	30	7	0.777777778	1	0	0	0	0	12	0	4	1	0	0	1	0	0	0	1	0	0	0	0	0	0	0	0	0	0	1
5	26	2	2003	30	6	1.074074074	1	0	0	0	0	22	2	2	0	0	0	1	0	0	0	0	1	0	0	0	0	0	0	0	0	0	0
5	30	2	2003	30	3	0.814814815	3	0	0	0	0	18	1	0	0	0	0	0	0	0	0	0	0	0	0	0	0	0	0	0	0	0	0
6	2	2	2003	30	6	0.703703704	1	0	0	0	0	12	0	2	0	0	1	2	0	0	0	0	1	0	0	0	0	0	0	0	0	0	0
6	3	2	2003	60	7	1.185185185	1	0	0	0	0	23	0	2	1	0	0	0	1	1	0	0	3	0	0	0	0	0	0	0	0	0	0
6	4	2	2003	30	5	0.37037037	1	1	0	0	0	3	0	1	4	0	0	0	0	0	0	0	0	0	0	0	0	0	0	0	0	0	0
6	5	2	2003	60	5	0.925925926	0	0	0	0	0	21	0	1	0	0	1	1	0	0	0	0	1	0	0	0	0	0	0	0	0	0	0
6	6	2	2003	60	8	0.814814815	0	2	0	1	0	9	1	6	1	0	0	0	0	0	0	0	0	0	0	0	0	0	1	0	0	0	1
6	7	2	2003	60	7	1	1	0	0	0	0	8	2	7	0	0	0	3	0	0	0	0	5	0	0	0	0	0	0	0	0	0	1
6	8	2	2003	60	5	2.111111111	0	0	0	0	0	46	0	5	0	0	1	0	0	0	0	4	1	0	0	0	0	0	0	0	0	0	0
6	9	2	2003	30	4	1.62962963	0	1	0	0	0	39	0	3	0	0	0	0	1	0	0	0	0	0	0	0	0	0	0	0	0	0	0
6	12	2	2003	30	6	0.777777778	2	0	0	1	0	13	0	3	0	0	0	1	0	0	0	0	0	0	0	1	0	0	0	0	0	0	0
6	14	2	2003	30	3	0.555555556	1	0	0	0	0	13	0	0	0	0	0	0	0	0	0	0	0	0	1	0	0	0	0	0	0	0	0
6	15	2	2003	30	3	0.888888889	1	0	0	0	0	21	0	0	0	0	0	0	0	0	0	0	0	0	0	0	0	0	2	0	0	0	0
6	16	2	2003	60	5	1.333333333	0	0	0	0	0	18	1	6	0	0	0	0	0	0	0	0	8	0	0	0	0	0	3	0	0	0	0
6	17	2	2003	30	6	1.037037037	0	0	0	0	0	21	0	1	1	0	0	1	0	0	0	0	3	0	0	0	0	0	0	0	0	0	1
6	18	2	2003	60	7	0.666666667	1	0	0	0	0	7	1	3	0	0	0	1	0	0	0	1	4	0	0	0	0	0	0	0	0	0	0
6	19	2	2003	60	4	1.666666667	2	0	0	0	0	27	11	0	0	0	0	0	0	0	0	0	5	0	0	0	0	0	0	0	0	0	0
6	20	2	2003	60	5	0.851851852	0	0	0	0	0	17	0	2	0	0	0	1	0	0	0	0	2	0	0	1	0	0	0	0	0	0	0
6	22	2	2003	60	6	1.740740741	0	0	0	0	0	28	13	2	1	0	0	2	0	0	0	1	0	0	0	0	0	0	0	0	0	0	0
6	23	2	2003	30	6	0.333333333	1	0	0	0	0	4	0	0	1	0	0	1	0	0	0	0	0	0	0	0	0	0	1	0	0	0	1
6	24	2	2003	60	6	1.111111111	0	0	0	0	0	22	0	3	2	0	0	1	0	0	0	1	1	0	0	0	0	0	0	0	0	0	0
6	25	2	2003	60	7	1.481481481	2	0	0	0	0	28	0	5	0	0	0	1	0	0	0	0	2	0	1	1	0	0	0	0	0	0	0
6	26	2	2003	60	8	1.777777778	1	2	0	0	0	29	7	4	0	0	0	3	0	0	0	0	0	0	0	1	0	0	1	0	0	0	0
6	30	2	2003	30	4	0.444444444	1	2	0	0	0	4	0	0	0	0	0	0	0	0	0	0	0	0	0	0	0	0	0	0	0	0	5
